# Supplementary material for: Pik3ca is required for mouse uterine gland development and pregnancy
Source: PubMed Central journal article supplement (PMC5773209; doi:10.1371/journal.pone.0191433), 2018-01-18
Supplement: pone.0191433.s001.pdf [file pone.0191433.s001.pdf]

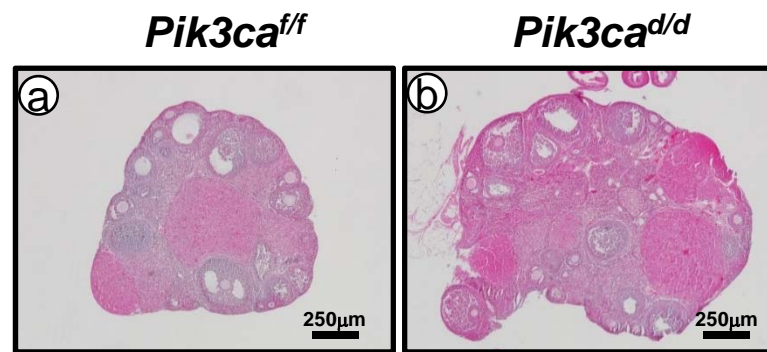

S1 Fig. Ovarian histology by H&E staining exhibited no difference between *Pik3ca*<sup>f/f</sup> and *Pik3ca*<sup>d/d</sup> mice.
