# Supplementary material for: Pik3ca is required for mouse uterine gland development and pregnancy
Source: PubMed Central journal article supplement (PMC5773209; doi:10.1371/journal.pone.0191433), 2018-01-18
Supplement: pone.0191433.s002.pdf [file pone.0191433.s002.pdf]

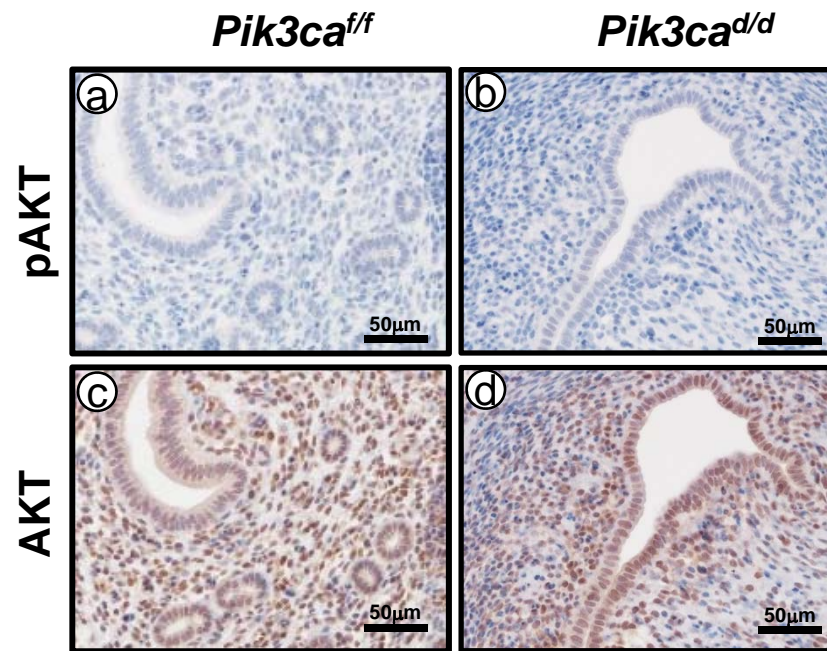

S2 Fig. The expression of total AKT and phosphor-AKT in the uterus of *Pik3ca<sup>f/f</sup>* and *Pik3ca<sup>d/d</sup>* mice.
